# Supplementary material for: Ultra-fast and highly sensitive enzyme-free glucose biosensing on a nickel–nickel oxide core–shell electrode
Source: Royal Society of Chemistry journal article supplement (doi:10.1039/c6ra25459d), 2017-01-01
Supplement: c6ra25459d1.pdf [file c6ra25459d1.pdf]

Supporting Information of:

Ultra-fast and higher sensitive enzyme-free glucose biosensing on nickel-nickel  
oxide core-shell electrode

Halima Begum, Mohammad Shamsuddin Ahmed, Seungwon Jeon\*

Department of chemistry and institute of basic science, Chonnam National University, Gwangju

500-757, Republic of Korea. Tel.: +82 62 530 0064; fax: +82 62 530 3389.

\*Corresponding author: [swjeon3380@naver.com](mailto:swjeon3380@naver.com)

## 1. Electrochemical and Instrumental Characterization

All electrochemical experiments were performed using a three-electrode potentiostat (CHI 700C electrochemical workstation, CH instrument, USA). A standard three-electrode setup was used with a GCE working electrode (geometric area: 0.0707 cm<sup>2</sup>), a Pt wire and an Ag/AgCl were used as counter electrode and reference electrode, respectively. Electrochemical impedance spectroscopy (EIS) was performed with a Versa State 3, manufactured by Metek, USA. All glucose sensing experiments were performed in an Ar purged 0.1 M NaOH in deionized water solution at room temperature (RT). A commercial glucose meter, ACCU-CHEK Performa, was used for glucose determination. The surface morphology of all NiNiO core-shell was characterized by a JSM-7500F JEOL for field emission scanning electron microscope (FESEM) and energy-dispersive X-ray spectroscopy (EDX). Transmission electron microscopy (TEM) images and were obtained by TECNAI model FI-20 (FEI, Netherland). X-ray photoelectron spectroscopic (XPS) spectrum was gained using a MultiLab 2000 with a 14.9 keV Al K X-ray

source. X-ray diffraction (XRD) spectra were carried out on a Rigaku D/max-2500, using filtered Cu K $\alpha$  radiation.

## 2. Treatment of human urine

Human urine was obtained from a healthy volunteer. 50 mL was centrifuged at 3287 g (7000 rpm) for 10 min at room temperature ( $\sim 25^\circ\text{C}$ ). The urine sample was analyzed immediately and was stored in refrigerator at low temperature until analysis.

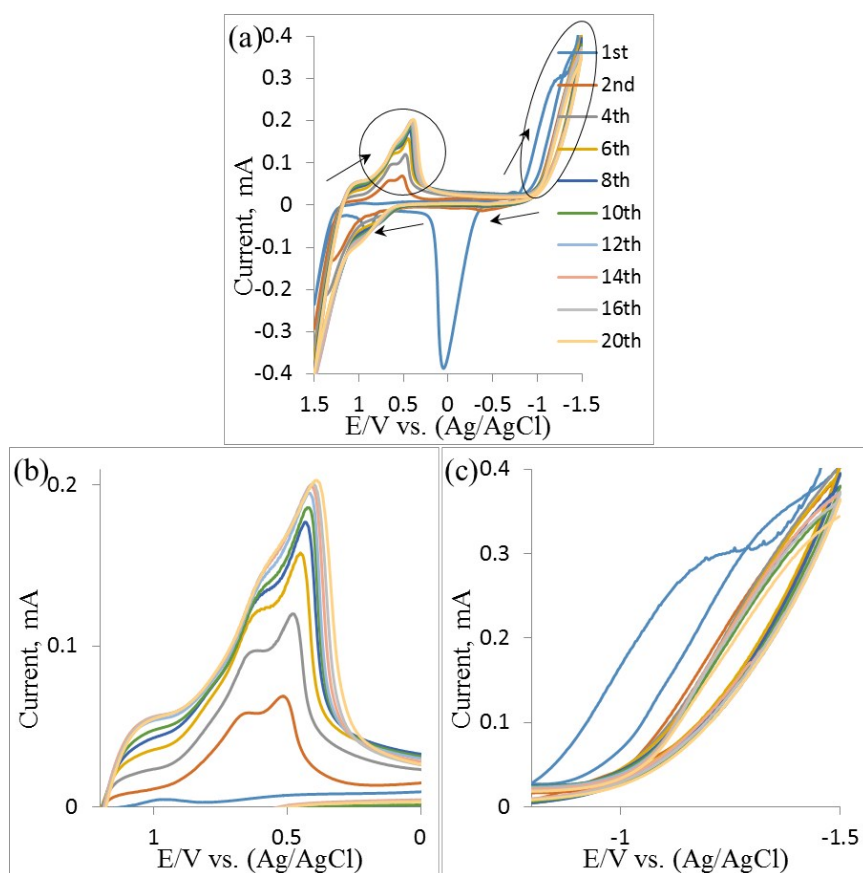

**Figure S1:** CVs of NiNiO electrodeposition onto GCE in Ar-purged 2.6 mg ml<sup>-1</sup> NiCl<sub>2</sub>·6H<sub>2</sub>O/10 mM HCl solution for 20 cycles at 50 mV s<sup>-1</sup> scan rate (a); enlarged CVs at low overpotential (b) and high overpotential (c).

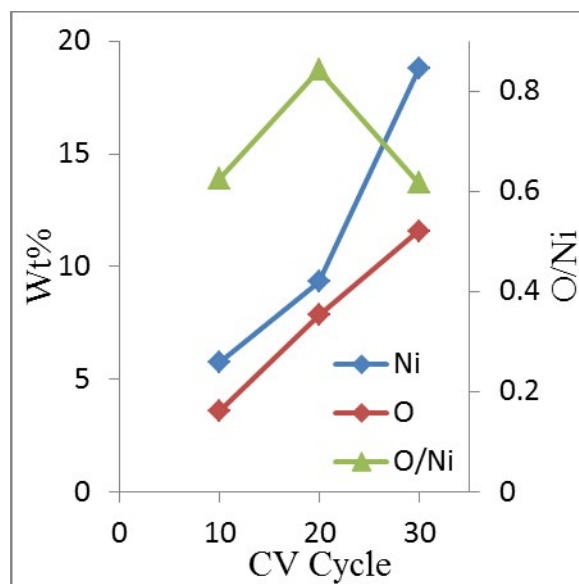

**Figure S2:** The plot of Ni and O elements with their ratio vs. CV cycles for 10, 20 and 30 CV cycles deposited NiNiO core-shell based on numerical analysis using EDX.

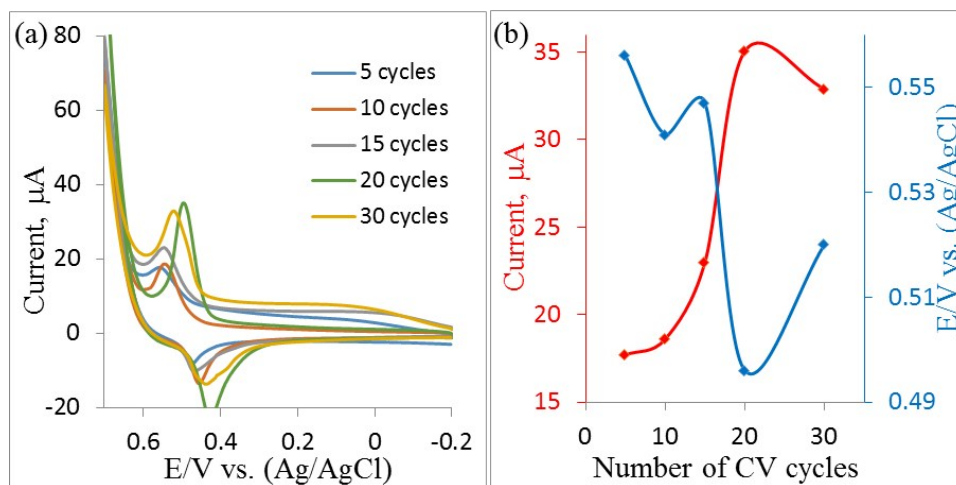

**Figure S3:** CVs at  $50 \text{ mV s}^{-1}$  scan rate in Ar-saturated  $0.1 \text{ M NaOH}$  on 5, 10, 15, 20, and 30 CV cycles deposited NiNiO core-shell-modified GCEs at  $50 \text{ mV s}^{-1}$  scan rate (a) and the plots of  $I_{pa}$  and  $E_{pa}$  as the function of CV cycles (b).

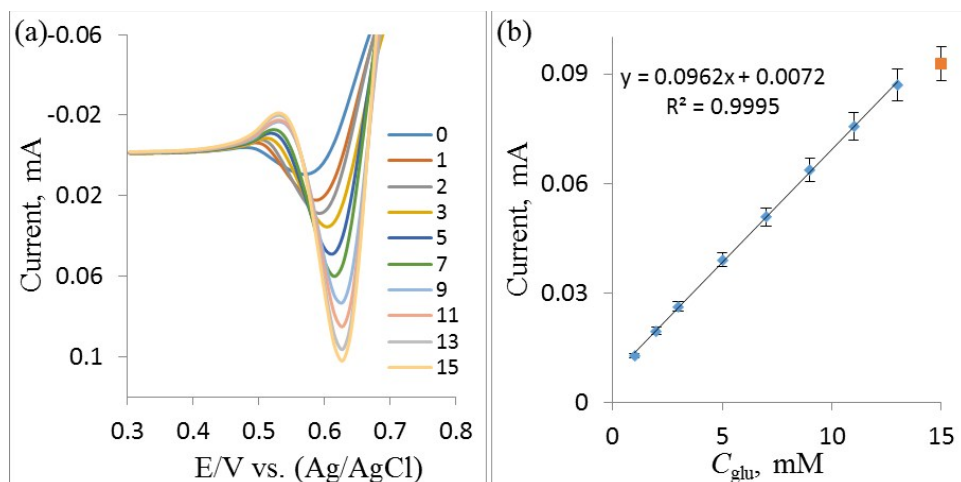

**Figure S4:** DPVs were recorded in Ar-saturated 0.1 M NaOH on NiNiO/GCE with sequential addition of glucose (a), plot of peak current vs.  $C_{Glu}$  with 5% error bar (b).

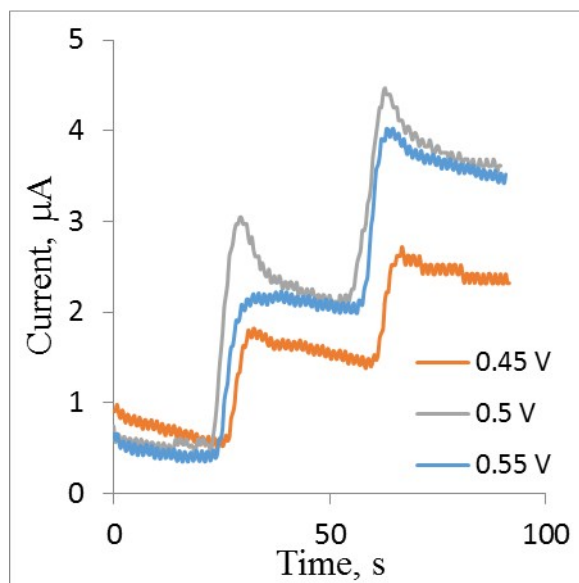

**Figure S5:** Amperometric response on NiNiO/GCE upon addition of 50  $\mu$ M glucose in Ar-saturated 0.1 M NaOH at different applied potentials for applied potential optimization.

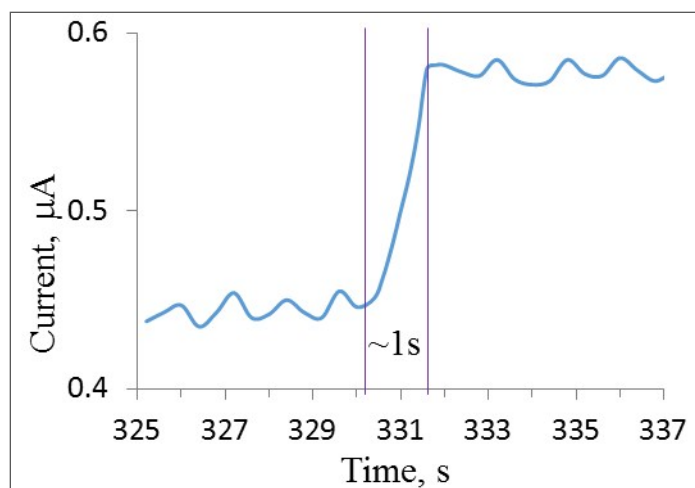

**Figure S6:** Enlarged CA response on NiNiO/GCE upon addition of glucose in Ar-saturated 0.1 M NaOH at an applied potential of 0.5 V.

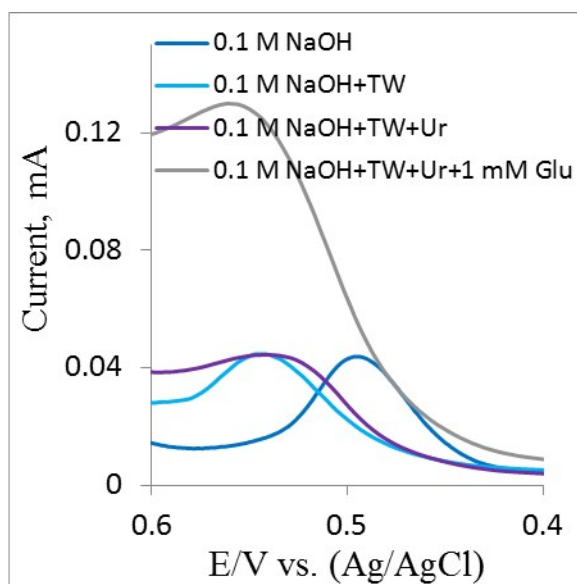

**Figure S7:** Enlarged CVs on NiNiO/GCE at  $50 \text{ mV s}^{-1}$  scan rate in Ar-saturated 0.1 M NaOH with subsequent addition of  $200 \text{ }\mu\text{L}$  TW,  $200 \text{ }\mu\text{L}$  Ur and 1 mM glucose.

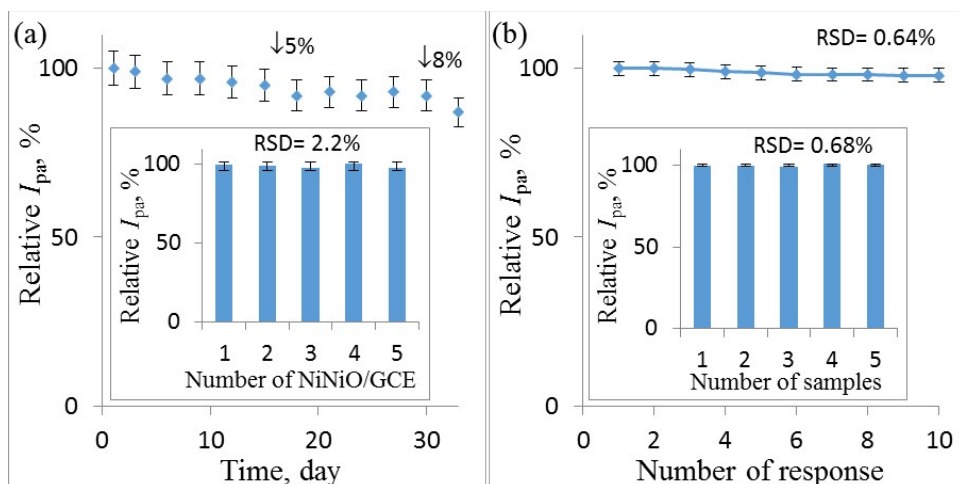

**Figure S8:** Long term stability evaluation of a single NiNiO core-shell-modified GCE over 33 days with 5% error bar (a), reproducibility test on five different NiNiO/GCEs for the detection of 1 mM glucose with 2.2% RSD (inset), the repeatability tested on a single NiNiO/GCE with 0.64 % RSD (b) and in five different glucose sample solutions with 0.68 % RSD (inset); all tests were evaluated by CV technique in Ar-saturated 0.1 M NaOH.

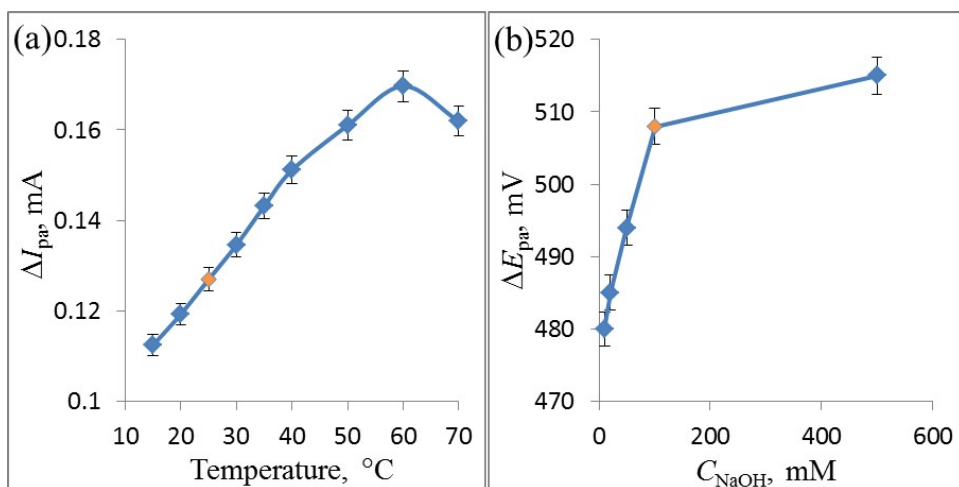

**Figure S9:** The temperature (a) and NaOH concentration effect (b) on the NiNiO core-shell-modified GCE in Ar-saturated 1 mM glucose containing 0.1 M (a) and 0.01-0.5 M (b) NaOH solution.

**Table S1:** Glucose detection in urine by a commercial glucose sensor and NiNiO core-shell-modified GCE biosensor method.

| Urine Samples | Added glucose (mM) | Glucometer (mM) | Our sensor (mM) | Recovery (%) |
|---------------|--------------------|-----------------|-----------------|--------------|
| 1             | 1.00               | 1.01            | 1.02            | 102          |
| 2             | 3.00               | 2.98            | 2.99            | 99.7         |
| 3             | 5.00               | 4.98            | 4.97            | 99.4         |
